# Supplementary material
Source: ML conference proceedings conference paper supplement (https://proceedings.mlr.press/v54/huggins17a.html)
Supplement: Supplementary file [file huggins17a-supp.pdf]

**SUPPLEMENTARY MATERIAL FOR  
QUANTIFYING THE ACCURACY OF APPROXIMATE  
DIFFUSIONS AND MARKOV CHAINS**

JONATHAN H. HUGGINS AND JAMES ZOU

APPENDIX A. EXPONENTIAL CONTRACTIVITY

A natural generalization of the strong concavity case is to assume that  $\log \pi$  is strongly concave for  $x$  and  $x'$  far apart and that  $\log \pi$  has “bounded convexity” when  $x$  and  $x'$  are close together. It turns out that in such cases Assumption 2.A still holds. More formally, the following assumption can be used even when the drift is not a gradient. For  $f : \mathcal{X} \rightarrow \mathbb{R}^d$  and  $r > 0$ , let

$$\kappa(r) \triangleq \inf \left\{ -2 \frac{(f(x) - f(x')) \cdot (x - x')}{r^2} : x, x' \in \mathcal{X}, \|x - x'\|_2 = r \right\}.$$

Define the constant  $R_0 = \inf\{R \geq 0 : \kappa(r) \geq 0 \forall r \geq R\}$ .

**Assumption A.1** (Strongly log-concave tails). *For the function  $f \in C^1(\mathcal{X}, \mathbb{R}^d)$ , there exist constants  $R, \ell \in [0, \infty)$  and  $k \in (0, \infty)$  such that*

$$\kappa(r) \geq -\ell \text{ for all } r \leq R \text{ and } \kappa(r) \geq k \text{ for all } r > R.$$

Furthermore,  $\kappa(r)$  is continuous and  $\int_0^1 r \kappa(r)^- dr < \infty$ .

**Theorem A.1** (Eberle [7], Wang [12]). *If Assumption A.1 holds for  $f = b$  then Assumption 2.A holds for*

$$C = \exp \left( \frac{1}{4} \int_0^{R_0} r \kappa(r) ds \right)$$

$$\frac{1}{\log(1/\rho)} \leq \begin{cases} \frac{3\epsilon}{2} \max(R^2, 8k^{-1}) & \text{if } \ell R_0^2 \leq 8 \\ 8\sqrt{2\pi} R^{-1} \ell^{-1/2} (\ell^{-1} + k^{-1}) e^{\ell R^2/8} + 32R^{-2} k^{-2} & \text{otherwise.} \end{cases}$$

For detailed calculations for the case of a mixture of Gaussians model, see Gorham et al. [9].

APPENDIX B. PROOFS OF THE MAIN RESULTS IN SECTION 3

We state all our results in the more general case of a diffusion on a convex space  $\mathcal{X} \subseteq \mathbb{R}^d$ . We begin with some additional definitions. Any set  $\mathcal{G} \subseteq C(\mathcal{X})$  defines an *integral probability metric* (IPM)

$$d_{\mathcal{G}}(\mu, \nu) = \sup_{\phi \in \mathcal{G}} |\mu(\phi) - \nu(\phi)|,$$

where  $\mu$  and  $\nu$  are measures on  $\mathcal{X}$ . The *Wasserstein metric*  $d_{\mathcal{W}}$  corresponds to  $\mathcal{W} \triangleq \{\phi \in C(\mathcal{X}) \mid \|\phi\|_L \leq 1\}$ , The set  $\mathcal{H} \triangleq \{\phi \in C^1(\mathcal{X}) \mid \|h\|_L \leq 1\}$  will be used to define an IPM  $d_{\mathcal{H}}$ . For a set  $\mathcal{Z} \subseteq \mathbb{R}^n$ , we use  $\partial\mathcal{Z}$  to denote the boundary of  $\mathcal{Z}$ .

Suppose  $\|b - \tilde{b}\|_2 \leq \epsilon$ . We first state several standard properties of the Wasserstein metric and invariant measures of diffusions. The proofs are included here for completeness.

**Lemma B.1.** *For any  $\mu, \nu \in \mathcal{P}(\mathcal{X})$ ,  $d_{\mathcal{H}}(\mu, \nu) = d_{\mathcal{W}}(\mu, \nu)$ .*

*Proof sketch.* The result follows since any Lipschitz function is continuous and a.e.-differentiable, and continuously differentiable functions are dense in the class of continuous and a.e.-differentiable functions.  $\square$

We use the notation  $(X_t)_{t \geq 0} \sim \text{Diff}(b, \Sigma)$  if  $X_t$  is a diffusion defined by

$$dX_t = b(X_t) dt + \Sigma dW_t - n_t L(dt).$$

A diffusion  $X_t$  is said to be *strong Feller* if its semigroup operator  $(\pi_t \phi)(x) \triangleq \mathbb{E}[\phi(X_{x,t})]$ ,  $\phi \in C(\mathcal{X})$ , satisfies the property that for all bounded  $\phi$ ,  $\pi_t \phi$  is bounded and continuous.

**Proposition B.2.** *Assume Assumption 2.B(1) holds and let  $(X_t)_{t \geq 0} \sim \text{Diff}(b, I)$ . Then for each  $x \in \mathcal{X}$ ,  $X_{x,t}$  has the invariant density  $\pi$  and is strong Feller.*

*Proof.* The existence of the diffusions follows from Tanaka [11, Theorem 4.1], the strong Feller property follows from Ethier and Kurtz [8, Ch. 8, Theorems 1.5 & 1.6], and the fact that  $\pi$  is the unique stationary measure follows since  $\mathcal{A}_b^* \pi = 0$ .  $\square$

By the same proof as Proposition B.2, we have

**Proposition B.3** (Diffusion properties). *For  $f \in C^0(\mathcal{X}, \mathbb{R}^d)$  with  $\|f\|_L < \infty$ , the diffusion  $(X_t)_{t \geq 0} \sim \text{Diff}(f, I)$  exists and has an invariant distribution  $\pi_f$ .*

**Proposition B.4** (Expectation of the generator). *For  $f \in C^0(\mathcal{X}, \mathbb{R}^d)$ , let the diffusion  $(X_t)_{t \geq 0} \sim \text{Diff}(f, I)$  have invariant density  $\pi_f$  and assume that linear functions are  $\pi_f$ -integrable. Then for all  $\phi \in C^2(\mathcal{X})$  such that  $\|\phi\|_L < \infty$  and  $\mathcal{A}_f \phi$  is  $\pi_f$ -integrable,  $\pi_f(\mathcal{A}_f \phi) = 0$ .*

*Proof.* Let  $P_t$  be the semigroup operator associated with  $(X_t)_{t \geq 0}$ :

$$(P_t \phi)(x) = \mathbb{E}[\phi(X_{x,t})].$$

Since by hypothesis linear functions are  $\pi_f$ -integrable and  $\phi$  is Lipschitz,  $\phi$  is  $\pi_f$ -integrable. Thus,  $P_t \phi$  is  $\pi_f$ -integrable and by the definition of an invariant measure (see [1, Definition 1.2.1] and subsequent discussion),

$$\pi_f(P_t \phi) = \pi_f \phi. \tag{B.1}$$

Using the fact that  $\partial_t P_t = P_t \mathcal{A}_f$  [1, Eq. (1.4.1)], differentiating both sides of Eq. (B.1), applying dominated convergence, and using the hypothesis that  $\mathcal{A}_f \phi$  is  $\pi_f$ -integrable yields

$$0 = \partial_t \pi_f(P_t \phi) = \pi_f(\partial_t P_t \phi) = \pi_f(P_t \mathcal{A}_f \phi) = \pi_f(\mathcal{A}_f \phi).$$

$\square$

We next show that the solution to Eq. (4.1) is Lipschitz continuous with a Lipschitz constant depending on the mixing properties of the diffusion associated with the generator.

**Proposition B.5** (Differential equation solution properties). *If Properties 2.A and Assumption 2.B(1) hold, then for any  $h \in C^1(\mathcal{X})$  with  $\|h\|_L < \infty$ , the function*

$$u_h(x) \triangleq \int_0^\infty (\pi(h) - \mathbb{E}[h(X_{x,t})]) dt$$

*exists and satisfies*

$$\|u_h\|_L \leq \frac{C}{\log(1/\rho)} \|h\|_L \quad (\text{B.2})$$

$$(\mathcal{A}_b u_h)(x) = h(x) - \pi(h). \quad (\text{B.3})$$

*Proof.* We follow the approach of Mackey and Gorham [10]. By Assumption 2.A and the definition of Wasserstein distance, we have that there is a coupling between  $X_{x,t}$  and  $X_{x',t}$  such that

$$\mathbb{E}[\|X_{x,t} - X_{x',t}\|_2] \leq C\|x - x'\|_2 \rho^t.$$

The function  $u_h$  is well-defined since for any  $x \in \mathcal{X}$ ,

$$\begin{aligned} \int_0^\infty |\pi(h) - \mathbb{E}[h(X_{x,t})]| dt &= \int_0^\infty \left| \int_{\mathcal{X}} (\mathbb{E}[h(X_{x',t})] - \mathbb{E}[h(X_{x,t})]) \pi(x') dx' \right| dt \\ &\leq \sup_{z \in \mathcal{X}} \|\nabla h(z)\|_2 \int_0^\infty \int_{\mathcal{X}} \mathbb{E}[\|X_{x,t} - X_{x',t}\|_2] \pi(x') dx' dt \\ &= \sup_{z \in \mathcal{X}} \|\nabla h(z)\|_2 \int_0^\infty \int_{\mathcal{X}} \|x - x'\|_2 C \rho^t \pi(x') dx' dt \\ &\leq \|h\|_L \mathbb{E}_{X \sim \pi}[\|x - X\|_2] \int_0^\infty C \rho^t dt \\ &< \infty, \end{aligned}$$

where the first line uses the property that  $\pi(h) = \int_{\mathcal{X}} \mathbb{E}[h(X_{x',t})] \pi(x') dx'$  and the final inequality follows from Assumption 2.B(2) and the assumption that  $0 < \rho < 1$ . Furthermore,  $u_h$  has bounded Lipschitz constant since for any  $x, x' \in \mathcal{X}$ ,

$$\begin{aligned} |u_h(x) - u_h(x')| &= \left| \int_0^\infty \mathbb{E}[h(X_{x,t}) - h(X_{x',t})] dt \right| \\ &\leq \sup_{z \in \mathcal{X}} \|\nabla h(z)\|_2 \int_0^\infty \mathbb{E}[\|X_{x,t} - X_{x',t}\|_2] dt \\ &\leq \|h\|_L \|x - x'\|_2 \int_0^\infty C \rho^t dt \\ &= \frac{C \|h\|_L}{\log(1/\rho)} \|x - x'\|_2. \end{aligned}$$

Finally, we show that  $(\mathcal{A}_b u_h)(x) = h(x) - \pi(h)$ . Recall that for  $h \in C(\mathcal{X})$ , the semigroup operator is given by  $(\pi_t h)(x) = \mathbb{E}[h(X_{x,t})]$ . Since  $X_{x,t}$  is strong Feller for all  $x \in \mathcal{X}$  by Proposition B.2, for all  $t \geq 0$ , its generator satisfies [8, Ch. 1, Proposition 1.5]

$$h - \pi_t h = \mathcal{A}_b \int_0^t (\pi(h) - \pi_s h) ds. \quad (\text{B.4})$$

Hence,

$$\begin{aligned}
& |h(x) - \pi(h) - [h(x) - (\pi_t h)(x)]| \\
&= \left| \int_{\mathcal{X}} \mathbb{E}[h(X_{x,t})] - \mathbb{E}[h(X_{x',t})] \pi(x') dx' \right| \\
&\leq \sup_{z \in \mathcal{X}} \|\nabla h(z)\|_2 \int_{\mathcal{X}} \mathbb{E}[\|X_{x',t} - X_{x,t}\|_2] \pi(x') dx' \\
&\leq \|h\|_L \mathbb{E}_{X \sim \pi}[\|x - X\|_2] C \rho^t.
\end{aligned}$$

Thus, conclude that the left-hand side of Eq. (B.4) converges pointwise to  $h(x) - \pi(h)$  as  $t \rightarrow \infty$ . Since  $\mathcal{A}_b$  is closed [8, Ch. 1, Proposition 1.6], the right-hand side of Eq. (B.4) limits to  $\mathcal{A}_b u_h$ . Hence,  $u_h$  solves Eq. (B.3).  $\square$

We can now prove the main result bounding the Wasserstein distance between the invariant distributions of the original and perturbed diffusions.

*Proof of Theorem 3.1.* By Proposition B.3 and Assumption 2.B, the hypotheses of Proposition B.4 hold for  $f = \tilde{b}$ . Let  $\mathcal{F} \triangleq \{u_h \mid h \in \mathcal{H}\}$ . Then

$$\begin{aligned}
d_{\mathcal{W}}(\pi, \tilde{\pi}) &= \sup_{h \in \mathcal{H}} |\pi(h) - \tilde{\pi}(h)| \quad \text{by definition and Assumption 2.B} \\
&= \sup_{h \in \mathcal{H}} |\pi(\mathcal{A}_b u_h) - \tilde{\pi}(\mathcal{A}_b u_h)| \quad \text{by Eq. (B.3)} \\
&= \sup_{h \in \mathcal{H}} |\tilde{\pi}(\mathcal{A}_b u_h)| \quad \text{by Proposition B.4} \\
&= \sup_{u \in \mathcal{F}} |\tilde{\pi}(\mathcal{A}_b u)| \quad \text{by definition of } \mathcal{F} \\
&= \sup_{u \in \mathcal{F}} |\tilde{\pi}(\mathcal{A}_b u - \mathcal{A}_{\tilde{b}} u)| \quad \text{by Proposition B.4} \\
&= \sup_{u \in \mathcal{F}} |\tilde{\pi}(\nabla u \cdot b - \nabla u \cdot \tilde{b})| \quad \text{by definition of } \mathcal{A}_b \\
&\leq \sup_{u \in \mathcal{F}} |\tilde{\pi}(\|\nabla u\|_2 \|b - \tilde{b}\|_2)| \\
&\leq \frac{C\epsilon}{\log(1/\rho)} \quad \text{by Eq. (B.2) and } \|b - \tilde{b}\|_2 \leq \epsilon.
\end{aligned}$$

$\square$

A similar analysis can be used to bound the Wasserstein distance between  $\pi$  and  $\tilde{\pi}$  when the approximate drift  $\tilde{b}$  is itself stochastic.

*Proof of Theorem 3.4.* We will need to consider the joint diffusions  $Z_t = (X_t, Y_t)$  and  $\tilde{Z}_t = (\tilde{X}_t, \tilde{Y}_t)$  on  $\mathcal{Z} \triangleq \mathcal{X} \times \mathbb{R}^d$ , where

$$\begin{aligned}
dZ_t &= (b(X_t), b_{aux}(Y_t)) dt + (\sqrt{2} dW_t^X, \Sigma dW_t^Y) - n_t L(dt) \\
d\tilde{Z}_t &= (\tilde{b}(\tilde{X}_t, \tilde{Y}_t), b_{aux}(\tilde{Y}_t)) dt + (\sqrt{2} d\tilde{W}_t^X, \Sigma d\tilde{W}_t^Y) - n_t \tilde{L}(dt).
\end{aligned}$$

Notice that  $X_t$  and  $Y_t$  are independent and the invariant distribution of  $X_t$  is  $\pi$ . Let  $\pi_Z$  and  $\tilde{\pi}_Z$  be the invariant distributions of  $Z_t$  and  $\tilde{Z}_t$ , respectively. Also note that the generators for  $Z_t$  and  $\tilde{Z}_t$  are, respectively,

$$\begin{aligned}
\mathcal{A}_Z \phi(z) &= \nabla \phi \cdot (b(x), b_{aux}(y)) + \Delta \phi_x(z) + \Sigma^\top \Sigma : H \phi_y(z) \\
\mathcal{A}_{\tilde{Z}} \phi(z) &= \nabla \phi \cdot (\tilde{b}(x, y), b_{aux}(y)) + \Delta \phi_x(z) + \Sigma^\top \Sigma : H \phi_y(z).
\end{aligned}$$

where  $H$  is the Hessian operator.

By Proposition B.3 and 2.B, the hypotheses of Proposition B.4 hold for  $f(x, y) = (\tilde{b}(x, y), b_{aux}(y))$ . Let  $\mathcal{H}_Z \triangleq \{h \in C^1(\mathcal{Z}) \mid \|h\|_L \leq 1\}$  and  $\mathcal{F}_Z \triangleq \{u_h \mid h \in \mathcal{H}_Z\}$ . Also, for  $z = (x, y) \in \mathcal{Z}$ , let  $\text{id}_Y(z) = y$ . Then, by reasoning analogous to that in the proof of Theorem 3.1,

$$\begin{aligned}
d_{\mathcal{W}}(\pi, \tilde{\pi}) &\leq d_{\mathcal{W}}(\pi_Z, \tilde{\pi}_Z) \\
&= \sup_{h \in \mathcal{H}_Z} |\pi_Z(h) - \tilde{\pi}_Z(h)| \\
&= \sup_{u \in \mathcal{F}_Z} |\tilde{\pi}_Z(\mathcal{A}_Z u - \mathcal{A}_{\tilde{Z}} u)| \\
&= \sup_{u \in \mathcal{F}_Z} |\tilde{\pi}_Z(\nabla u \cdot b - \nabla u \cdot \tilde{b})| \\
&= \sup_{u \in \mathcal{F}_Z} |\mathbb{E}[\nabla u(\tilde{X}, \tilde{Y}) \cdot \mathbb{E}[b(\tilde{X}) - \tilde{b}(\tilde{X}, \tilde{Y}) \mid \tilde{X}]]| \\
&\leq \sup_{u \in \mathcal{F}_Z} |\mathbb{E}[\|\nabla u(\tilde{X}, \tilde{Y})\|_2] \mathbb{E}[|b(\tilde{X}) - \tilde{b}(\tilde{X}, \tilde{Y})| \mid \tilde{X}]| \\
&\leq \frac{C \tilde{\pi}(\epsilon)}{\log(1/\rho)}.
\end{aligned}$$

□

*Proof of Theorem 3.5.* The proof is very similar to that of Theorem 3.1, the only difference is in the Lipschitz coefficient of the differential equation solution  $u_h(x)$  in B.5. Using polynomial contractivity, we have

$$\begin{aligned}
|u_h(x) - u_h(x')| &= \left| \int_0^\infty \mathbb{E}[h(X_{x,t}) - h(X_{x',t})] dt \right| \\
&\leq \sup_{z \in \mathcal{X}} \|\nabla h(z)\|_2 \int_0^\infty \mathbb{E}[\|X_{x,t} - X_{x',t}\|_2] dt \\
&\leq \|h\|_L \|x - x'\|_2 \int_0^\infty C(t + \beta)^{-\alpha} dt \\
&= \frac{C \|h\|_L}{(\alpha - 1)\beta^{\alpha-1}} \|x - x'\|_2.
\end{aligned}$$

Plugging in this Lipschitz constant, we have

$$d_{\mathcal{W}}(\pi, \tilde{\pi}) \leq \frac{C\epsilon}{(\alpha - 1)\beta^{\alpha-1}}.$$

□

### APPENDIX C. CHECKING THE INTEGRABILITY CONDITION

The following result gives checkable conditions under which Assumption 2.B(3) holds. Let  $\mathbb{B}_R \triangleq \{x \in \mathbb{R}^d \mid \|x\|_2 \leq R\}$ .

**Proposition C.1** (Ensuring integrability). *Assumption 2.B(3) is satisfied if  $b = \nabla \log \pi$ ,  $\tilde{b} = \nabla \log \tilde{\pi}$ ,  $\|b - \tilde{b}\|_2 \leq \epsilon$ , and either*

- (1) *there exist constants  $R > 0, B > 0, \delta > 0$  such that for all  $x \in \mathcal{X} \setminus \mathbb{B}_R$ ,  $\|b(x) - \tilde{b}(x)\|_2 \leq B/\|x\|_2^{1+\delta}$ ; or*
- (2) *there exists a constant  $R > 0$  such that for all  $x \in \mathcal{X} \setminus \mathbb{B}_R$   $x \cdot (b(x) - \tilde{b}(x)) \geq 0$ .*

*Proof.* For case (1), first we note that since  $\int_{\mathcal{X}} (\pi(x) - \tilde{\pi}(x)) dx = 0$ , by the (generalized) intermediate value theorem, there exists  $x^* \in \mathcal{X}$  such that  $\pi(x^*) - \tilde{\pi}(x^*) = 0$ , and hence  $\log \pi(x^*) - \log \tilde{\pi}(x^*) = 0$ . Let  $p[x^*, x]$  be any path from  $x^*$  to  $x$ . By the fundamental theorem of calculus for line integrals,

$$\begin{aligned} |\log \pi(x) - \log \tilde{\pi}(x)| &= \left| \log \tilde{\pi}(x^*) - \log \pi(x^*) + \int_{\gamma[x^*, x]} (b(r) - \tilde{b}(r)) \cdot dr \right| \\ &= \left| \int_{\gamma[x^*, x]} (b(r) - \tilde{b}(r)) \cdot r'(t) dt \right| \\ &\leq \int_{\gamma[x^*, x]} \|b(r) - \tilde{b}(r)\|_2 \|r'(t)\|_2 dt. \end{aligned}$$

First consider  $x \in \mathcal{X} \cap \mathbb{B}_R$ . Choosing  $p[x^*, x]$  to be the linear path  $\gamma[x^*, x]$ , we have

$$\begin{aligned} |\log \pi(x) - \log \tilde{\pi}(x)| &\leq \epsilon \int_{\gamma[x^*, x]} \|r'(t)\|_2 dt \\ &= \epsilon \|x - x^*\|_2 \\ &\leq (R + \ell^*)\epsilon, \end{aligned} \tag{C.1}$$

where  $\ell^* \triangleq \|x^*\|_2$ .

Next consider  $x \in \mathcal{X} \setminus \mathbb{B}_R$ . Let  $\ell \triangleq \|x\|_2$  and  $x' = \frac{R}{\ell}x$ . Choose  $p[x^*, x]$  to consist of the concatenation of the linear paths  $\gamma[x^*, 0]$ ,  $\gamma[0, x']$ , and  $\gamma[x', 0]$ , so

$$\begin{aligned} &\int_{p[x^*, x]} \|b(r) - \tilde{b}(r)\|_2 \|r'(t)\|_2 dt \\ &= \int_{\gamma[x^*, 0]} \|b(r) - \tilde{b}(r)\|_2 \|r'(t)\|_2 dt + \int_{\gamma[0, x']} \|b(r) - \tilde{b}(r)\|_2 \|r'(t)\|_2 dt \\ &\quad + \int_{\gamma[x', 0]} \|b(r) - \tilde{b}(r)\|_2 \|r'(t)\|_2 dt. \end{aligned}$$

Now, we bound each term:

$$\begin{aligned} \int_{\gamma[x^*, 0]} \|b(r) - \tilde{b}(r)\|_2 \|r'(t)\|_2 dt &\leq \ell^* \epsilon \\ \int_{\gamma[0, x']} \|b(r) - \tilde{b}(r)\|_2 \|r'(t)\|_2 dt &\leq R\epsilon \\ \int_{\gamma[x', 0]} \|b(r) - \tilde{b}(r)\|_2 \|r'(t)\|_2 dt &\leq (\ell - R)B \int_0^1 \frac{1}{(R + (\ell - R)t)^{1+\delta}} \\ &= (\ell - R)B \left[ \frac{1}{(\ell - R)R^\delta} - \frac{1}{(\ell - R)\ell^\delta} \right] \\ &\leq \frac{B}{R^\delta}. \end{aligned}$$

It follows that there exists a constant  $\tilde{B} > 0$  such that for all  $x \in \mathcal{X}$ ,  $|\log \pi(x) - \log \tilde{\pi}(x)| < \tilde{B}$ . Hence  $\tilde{B}^{-1}\pi < \tilde{\pi} < \tilde{B}\pi$ , so  $\phi$  is  $\pi$ -integrable if and only if it is  $\tilde{\pi}$ -integrable.

Case (2) requires a slightly more delicate argument. Let  $x^*$  and  $\ell^*$  be the same as in case (1). For  $x \in \mathcal{X} \cap \mathbb{B}_R$ , it follows from Eq. (C.1) that

$$\log \pi(x) - \log \tilde{\pi}(x) \geq -(R + \ell^*)\epsilon.$$

For  $x \in \mathcal{X} \setminus \mathbb{B}_R$ , arguing as above yields

$$\begin{aligned}
 \log \pi(x) - \log \tilde{\pi}(x) &= \int_{p[x^*, x]} (b(r) - \tilde{b}(r)) \cdot dr \\
 &\geq - \int_{p[x^*, r']} \|b(r) - \tilde{b}(r)\|_2 \|r'(t)\|_2 dt \\
 &\quad + \int_{\gamma[x', x]} (b(r) - \tilde{b}(r)) \cdot r'(t) dt \\
 &\geq -(R + \ell^*)\epsilon + \int_{\gamma[x', x]} (b(q(t)x) - \tilde{b}(q(t)x)) \cdot ax dt \\
 &\geq -(R + \ell^*)\epsilon,
 \end{aligned}$$

where we have used the fact that  $r(t) = q(t)x$  for some linear function  $q(t)$  with slope  $a > 0$ . Combining the previous two displays, conclude that for all  $x \in \mathcal{X}$ ,  $\tilde{\pi}(x) \leq e^{(R+\ell^*)\epsilon}\pi(x)$ , hence Assumption 2.B(3) holds.  $\square$

We suspect Proposition C.1 continues to hold even when  $b \neq \nabla \log \pi$  and  $\tilde{b} \neq \nabla \log \tilde{\pi}$ . Note that condition (1) always holds if  $\mathcal{X}$  is compact, but also holds for unbounded  $\mathcal{X}$  as long as the error in the gradients decays sufficiently quickly as  $\|x\|_2$  grows large. Given an approximate distribution for which  $\|b - \tilde{b}\|_2 \leq \epsilon/2$ , it is easy to construct a new distribution that satisfies condition (2):

**Proposition C.2.** *Assume that  $\tilde{\pi}$  satisfies  $\|b - \tilde{b}\|_2 \leq \epsilon/2$  and let*

$$f_R(x) \triangleq -\frac{\epsilon x}{2\|x\|_2} \{(2\|x\|_2/R - 1)\mathbb{1}[R/2 \leq \|x\|_2 < R] + \mathbb{1}[\|x\|_2 \geq R]\}.$$

Then the distribution

$$\tilde{\pi}_R(x) \propto \tilde{\pi}(x)e^{f_R(x)}$$

satisfies condition (2) of Proposition C.1.

*Proof.* Let  $\tilde{b}_R \triangleq \nabla \log \tilde{\pi}_R$ . First we verify that  $\|b - \tilde{b}_R\|_2 \leq \epsilon$ . For  $x \in \mathcal{X} \cap \mathbb{B}_{R/2}$ ,  $\tilde{\pi}_R(x) = \tilde{\pi}(x)$ , so  $\|b(x) - \tilde{b}_R(x)\|_2 \leq \epsilon/2$ . Otherwise  $x \in \mathcal{X} \setminus \mathbb{B}_{R/2}$ , in which case since  $\|f_R(x)\| \leq \epsilon/2$  it follows that  $\|b(x) - \tilde{b}_R(x)\|_2 \leq \epsilon$ . To verify condition (2), calculate that for  $x \in \mathcal{X} \setminus \mathbb{B}_R$ ,

$$x \cdot (b(x) - \tilde{b}_R(x)) = x \cdot \left( b(x) - \tilde{b}(x) - \frac{\epsilon x}{2\|x\|_2} \right) \geq \frac{\epsilon\|x\|_2}{2} - \frac{x \cdot \epsilon x}{2\|x\|_2} = 0.$$

$\square$

By taking  $R$  very large in Proposition C.2, we can ensure the integrability condition holds without having any practical effect on the approximating drift since  $\tilde{b}_R(x) = \tilde{b}(x)$  for all  $x \in \mathbb{B}_{R/2}$ . Thus, it is safe to view Assumption 2.B(3) as a mild regularity condition.

#### APPENDIX D. APPROXIMATION RESULTS FOR PIECEWISE DETERMINISTIC MARKOV PROCESSES

In the section we obtain results for a broader class of PDMPs which includes the ZZP a special case [2]. The class of PDMPs we consider are defined on the space  $E \triangleq \mathbb{R}^d \times \mathcal{B}$ , where  $\mathcal{B}$  is a finite set. Let  $A \in C^0(E, \mathbb{R}_+^{\mathcal{B}})$  and let  $F \in C^0(E, \mathbb{R}^d)$  be such that for each  $\theta \in \mathcal{B}$ ,  $F(\cdot, \theta)$  is a smooth vector field for which

the differential equation  $\partial_t x_t = F(x_t, \theta)$  with initial condition  $x_0 = x$  has a unique global solution. For  $\phi \in C(E)$ , the standard differential operator  $\nabla_x \phi(x, \theta) \in \mathbb{R}^d$  is given by  $(\nabla_x \phi(x, \theta))_i \triangleq \frac{\partial \phi}{\partial x_i}(x, \theta)$  for  $i \in [d]$  and the discrete differential operator  $\nabla_\theta \phi(x, \theta) \in \mathbb{R}^{\mathcal{B}}$  is given by  $(\nabla_\theta \phi(x, \theta))_{\theta'} \triangleq \phi(x, \theta') - \phi(x, \theta)$ . The PDMP  $(X_t, \Theta_t)_{t \geq 0}$  determined by the pair  $(F, A)$  has infinitesimal generator

$$\mathcal{A}_{F,A}\phi = F \cdot \nabla_x \phi + A \cdot \nabla_\theta \phi.$$

We consider the cases when either or both of  $A$  and  $F$  are approximated (in the case of ZZP, only  $A$  is approximated while  $F$  is exact). The details of the polynomial contractivity condition depend on which parts of  $(F, A)$  are approximated. We use the same notation for the true and approximating PDMPs with, respectively, infinitesimal generators  $\mathcal{A}_{F,A}$  and  $\mathcal{A}_{\tilde{F},\tilde{A}}$ , as we did for the ZZPs in Section 6.

**Assumption D.2 (PDMP error and polynomial contractivity).**

- (1) There exist  $\epsilon_F, \epsilon_A \geq 0$  such that  $\|F - \tilde{F}\|_2 \leq \epsilon_F$  and  $\|A - \tilde{A}\|_1 \leq \epsilon_A$ .
- (2) For each  $(x, \theta) \in E$ , let  $\mu_{x,\theta,t}$  denote the law of the PDMP  $(X_{x,\theta,t}, \Theta_{x,\theta,t})$  with generator  $\mathcal{A}_{F,A}$ . There exist constants  $\alpha > 1$  and  $\beta > 0$  and a function  $B \in C(E \times E, \mathbb{R}_+)$  such that for all  $x, x' \in \mathbb{R}^d$  and  $\theta, \theta' \in \mathcal{B}$ ,

$$d_{\mathcal{W}}(\mu_{x,\theta,t}, \mu_{x',\theta',t}) \leq B(x, \theta, x', \theta')(t + \beta)^{-\alpha}.$$

Furthermore, if  $\epsilon_F > 0$ , then there exists  $C_F > 0$  such that  $B(x, \theta, x', \theta) \leq C_F \|x - x'\|_2$  and if  $\epsilon_A > 0$ , then there exists  $C_A > 0$  such that  $B(x, \theta, x, \theta') \leq C_A$ . If  $\epsilon_F = 0$  take  $C_F = 0$  and if  $\epsilon_A = 0$  take  $C_A = 0$ .

We also require some regularity conditions similar to those for diffusions.

**Assumption D.3 (PDMP regularity conditions).** Let  $\pi$  and  $\tilde{\pi}$  denote the stationary distributions of the PDMPs with, respectively, infinitesimal generators  $\mathcal{A}_{F,A}$  and  $\mathcal{A}_{\tilde{F},\tilde{A}}$ .

- (1) The stationary distributions  $\pi$  and  $\tilde{\pi}$  exist.
- (2) The target density satisfies  $\int_E x^2 \pi(dx, d\theta) < \infty$ .
- (3) If a function  $\phi \in C(E, \mathbb{R})$  is  $\pi$ -integrable then it is  $\tilde{\pi}$ -integrable.

**Theorem D.1 (PDMP error bounds).** If Assumptions D.2 and D.3 hold, then

$$d_{\mathcal{W}}(\pi, \tilde{\pi}) \leq \frac{C_F \epsilon_F + C_A \epsilon_A}{(\alpha - 1) \beta^{\alpha-1}}.$$

*Proof sketch.* For  $h \in C_L(\mathbb{R}^d)$ , we need to solve

$$h - \pi(h) = \mathcal{A}_{F,A} u.$$

Similarly to before, the solution is

$$u_h(x, \theta) \triangleq \int_0^\infty (\pi(h) - \mathbb{E}[h(X_{x,\theta,t})]) dt,$$

which can be verified as in the diffusion case using Assumptions D.2(2) and D.3. Furthermore, for  $x, x' \in \mathbb{R}^d$  and  $\theta, \theta' \in \mathcal{B}$ , by Assumption D.2(2),

$$\begin{aligned} |u_h(x, \theta) - u_h(x', \theta)| &\leq \|h\|_L \int_0^\infty C_F \|x - x'\|_2 (t + \beta)^{-\alpha} dt \\ &= \frac{C \|h\|_L}{(\alpha - 1) \beta^{\alpha-1}} \|x - x'\|_2 \end{aligned}$$



and

$$|u_h(x, \theta) - u_h(x, \theta')| \leq \|h\|_L \int_0^\infty C_A(t + \beta)^{-\alpha} dt = \frac{C_A \|h\|_L}{(\alpha - 1)\beta^{\alpha-1}}.$$

We bound  $d_{\mathcal{W}}(\pi, \tilde{\pi})$  as in Theorem 3.4, but now using the fact that for  $u = u_h$ ,  $h \in C_L(\mathbb{R}^d)$ , we have

$$\begin{aligned} \mathcal{A}_{F,A}u_h - \mathcal{A}_{\tilde{F},\tilde{A}}u_h &= (F - \tilde{F}) \cdot \nabla_x u_h + (A - \tilde{A}) \cdot \nabla_\theta u_h \\ &\leq \|F - \tilde{F}\|_2 \|\nabla_x u_h\|_2 + \|A - \tilde{A}\|_1 \|\nabla_\theta u_h\|_\infty \\ &\leq \frac{C_F \epsilon_F + C_A \epsilon_A}{(\alpha - 1)\beta^{\alpha-1}}. \end{aligned}$$

□

**D.1. Hamiltonian Monte Carlo.** We can write an idealized form of Hamiltonian Monte Carlo (HMC) as a PDMP  $(X_t, P_t)_{t \geq 0}$  by having the momentum vector  $P_t \in \mathbb{R}^d$  refresh at a constant rate  $\lambda$ . Let  $R_t$  be a compound Poisson process with rate  $\lambda > 0$  and jump size distribution  $\mathcal{N}(0, M)$ , where  $M \in \mathbb{R}^{d \times d}$  is a positive-definite mass matrix. That is, if  $\Gamma_t$  is a homogenous Poisson (counting) process with rate  $\lambda$  and  $J_i \sim \mathcal{N}(0, M)$ , then

$$R_t \sim \sum_{i=1}^{\Gamma_t} J_i.$$

We can then write the HMC dynamics as

$$\begin{aligned} dX_t &= M^{-1} P_t dt \\ dP_t &= \nabla \log \pi(X_t) dt + dR_t. \end{aligned}$$

The infinitesimal generator for  $(X_t, P_t)_{t \geq 0}$  is

$$\begin{aligned} &\mathcal{A}_{\lambda, M, \pi} \phi(x, p) \\ &= M^{-1} p \cdot \nabla_x \phi(x, p) + \nabla \log \pi(x) \cdot \nabla_p \phi(x, p) + \lambda \left( \int \phi(x, p') \nu_M(dp') - \phi(x, p) \right), \end{aligned}$$

where  $\nu_M$  is the density of  $\mathcal{N}(0, M)$ . Let  $\mu_{x,p,t}$  denote the law of  $(X_{x,p,t}, P_{x,p,t})$  with generator  $\mathcal{A}_{\lambda, M, \pi}$ . The proof of the following theorem is similar to that for Theorem D.1:

**Theorem D.2** (HMC error bounds). *Assume that:*

- (1)  $\|\nabla \log \pi - \nabla \log \tilde{\pi}\|_2 \leq \epsilon$ .
- (2) *there exist constants  $C > 0$  and  $0 < \rho < 1$  such that*

$$d_{\mathcal{W}}(\mu_{x,p,t}, \mu_{x,p',t}) \leq C \|p - p'\|_2 \rho^t.$$

- (3) *The stationary distributions of the PDMPs with, respectively, infinitesimal generators  $\mathcal{A}_{\lambda, M, \pi}$  and  $\mathcal{A}_{\lambda, M, \tilde{\pi}}$ , exist (they are, respectively,  $\pi \times \mu_M$  and  $\tilde{\pi} \times \mu_M$ ).*
- (4) *The target density satisfies  $\int_E x^2 \pi(dx) < \infty$ .*
- (5) *If a function  $\phi \in C(\mathbb{R}^d, \mathbb{R})$  is  $\pi$ -integrable then it is  $\tilde{\pi}$ -integrable.*

Then

$$d_{\mathcal{W}}(\pi, \tilde{\pi}) \leq \frac{C\epsilon}{\log(1/\rho)}.$$

## APPENDIX E. ANALYSIS OF COMPUTATIONAL–STATISTICAL TRADE-OFF

In this section we prove Theorem 5.1. In order to apply results on the approximation accuracy of ULA [3–5], we need the following property to hold for the exact and approximate drift functions.

**Assumption E.4** (Strong log-concavity). *There exists a positive constant  $k_f > 0$  such that for all  $x, x' \in \mathcal{X}$ ,*

$$(f(x) - f(x')) \cdot (x - x') \leq -k_f \|x - x'\|_2^2.$$

We restate the convexity smoothness requirements given in Assumption 5.D with some additional notations.

**Assumption E.5.**

- (1) *The function  $\log \pi_0 \in C^3(\mathbb{R}^d, \mathbb{R})$  is  $k_0$ -strongly concave,  $L_0 \triangleq \|\nabla \log \pi_0\|_L < \infty$ , and  $\|H[\partial_j \log \pi_0]\|_* \leq M_0 < \infty$  for  $j = 1, \dots, d$ .*
- (2) *There exist constants  $k_\phi$ ,  $L_\phi$ , and  $M_\phi$  such that for  $i = 1, \dots, N$ , the function  $\phi_i \in C^3(\mathbb{R}, \mathbb{R})$  is  $k_\phi$ -strongly concave,  $\|\phi_i'\|_L \leq L_\phi < \infty$ , and  $\|\phi_i'''\|_\infty \leq M_\phi < \infty$ .*

Note that under Assumption E.4, there is a unique  $x^* \in \mathbb{R}^d$  such that  $f(x^*) = 0$ . Our results in this section are based on the following bound on the Wasserstein distance between the law of ULA Markov chain and  $\pi_f$ :

**Theorem E.1** ([5, Theorem 3], [6, Corollary 3]). *Assume that E.4 holds and the  $L_f \triangleq \|f\|_L < \infty$ . Let  $\kappa_f \triangleq 2k_f L_f / (k_f + L_f)$  and let  $\mu_{x,T}$  denote the law of  $X'_{x,T}$ . Take  $\gamma_i = \gamma_1 i^{-\alpha}$  with  $\alpha \in (0, 1)$  and set*

$$\gamma_1 = 2(1 - \alpha)\kappa_f^{-1}(2/T)^{1-\alpha} \log \left( \frac{\kappa_f T}{2(1 - \alpha)} \right).$$

If  $\gamma_1 < 1/(k_f + L_f)$ , then

$$d_{\mathcal{W}}^2(\mu_{x,T}, \pi_f) \leq 16(1 - \alpha)L_f^2 \kappa_f^{-3} dT^{-1} \log \left( \frac{\kappa_f T}{2(1 - \alpha)} \right).$$

For simplicity we fix  $\alpha = 1/2$ , though the same results hold for all  $\alpha \in (0, 1)$ , just with different constants. Take  $\{\gamma_i\}_{i=1}^\infty$  as defined in Theorem E.1. Let  $x^* = \arg \max_x \mathcal{L}(x)$ , let  $S_k \triangleq \sum_{i=1}^N \|y_i\|_2^k$ , and let  $A \triangleq \sum_{i=1}^N y_i y_i^\top$ . The drift for this model is

$$b(x) \triangleq \nabla \mathcal{L}(x) = \nabla \log \pi_0(x) + \sum_{i=1}^N \phi_i'(x \cdot y_i) y_i.$$

By Taylor's theorem, the  $j$ -th component of  $b(x)$  can be rewritten as

$$\begin{aligned} b_j(x) &= \partial_j \log \pi_0(x^*) + \nabla \partial_j \log \pi_0(x^*) \cdot (x - x^*) + R(\partial_j \log \pi_0, x) \\ &\quad + \sum_{i=1}^N \phi_i'(x^* \cdot y_i) y_{ij} + \phi_i''(x^* \cdot y_i) y_{ij} y_i \cdot (x - x^*) + R(\phi_i'(\cdot \cdot y_i) y_{ij}, x) \\ &= \nabla \partial_j \log \pi_0(x^*) \cdot (x - x^*) + R(\partial_j \log \pi_0, x) \\ &\quad + \sum_{i=1}^N \phi_i''(x^* \cdot y_i) y_{ij} y_i \cdot (x - x^*) + R(\phi_i'(\cdot \cdot y_i) y_{ij}, x), \end{aligned} \tag{E.1}$$

where

$$R(f, x) \triangleq \|x - x^*\|_2^2 \int_0^1 (1-t) Hf(x^* + t(x - x^*)) dt.$$

Hence we can approximate the drift with a first-order Taylor expansion around  $x^*$ :

$$\tilde{b}(x) \triangleq (H \log \pi_0)(x^*)(x - x^*) + \sum_{i=1}^N \phi_i''(x^* \cdot y_i) y_i y_i^\top (x - x^*).$$

Observe that Assumption E.4 is satisfied for  $f = b$  and  $f = \tilde{b}$  with  $k_f = k_N \triangleq k_0 + k_\phi \|A\|_*$ . Furthermore, Assumption 2.B is satisfied with  $\|\tilde{b}\|_L \leq L_N \triangleq L_0 + L_\phi S_2$  and  $\|b\|_L \leq L_N$  as well since

$$\begin{aligned} \|\phi_i'(x_1 \cdot y_i) y_i - \phi_i'(x_2 \cdot y_i) y_i\|_2 &\leq |\phi_i'(x_1 \cdot y_i) - \phi_i'(x_2 \cdot y_i)| \|y_i\|_2 \\ &\leq L_\phi |x_1 \cdot y_i - x_2 \cdot y_i| \|y_i\|_2 \\ &\leq L_\phi \|y_i\|_2^2 \|x_1 - x_2\|_2. \end{aligned}$$

Thus,  $b$  and  $\tilde{b}$  satisfy the same regularity conditions.

We next show that they cannot deviate too much from each other. Using Eq. (E.1) and regularity assumptions we have

$$\begin{aligned} \|b(x) - \tilde{b}(x)\|_2^2 &= \sum_{j=1}^d \left( R(\partial_j \log \pi_0, x) + \sum_{i=1}^N R(\phi_i'(\cdot \cdot y_i) y_{ij}, x) \right)^2 \\ &\leq \|x - x^*\|_2^4 \sum_{j=1}^d \left( M_0 + \sum_{i=1}^N M_\phi \|y_i\|_2^2 y_{ij} \right)^2 \\ &\leq d \|x - x^*\|_2^4 \left( M_0 + M_\phi \sum_{i=1}^N \|y_i\|_2^3 \right)^2. \end{aligned}$$

It follows from [5, Theorem 1(ii)] that

$$\tilde{\pi}(\|b - \tilde{b}\|_2) \leq d^{3/2} M_N k_N^{-1},$$

where  $M_N \triangleq M_0 + M_\phi S_3$ .

Putting these results together with Theorems 3.1 and E.1 and applying the triangle inequality, we conclude that

$$\begin{aligned} d_{\mathcal{W}}^2(\mu_T^*, \pi) &\leq \frac{(k_N + L_N)^3 d \log \left( \frac{2k_N L_N T}{k_N + L_N} \right)}{k_N^3 L_N T} \\ d_{\mathcal{W}}^2(\tilde{\mu}_{\tilde{T}}^*, \pi) &\leq \frac{2(k_N + L_N)^3 d \log \left( \frac{2k_N L_N \tilde{T}}{k_N + L_N} \right)}{k_N^3 L_N \tilde{T}} + \frac{2d^3 M_N^2}{k_N^4}. \end{aligned}$$

In order to compare the bounds we must make the computational budgets of the two algorithms equal. Recall that we measure computational cost by the number of  $d$ -dimensional inner products performed, so ULA with  $b$  costs  $TN$  and ULA with  $\tilde{b}$  costs  $(\tilde{T} + N)d$ . Equating the two yields  $\tilde{T} = N(T/d - 1)$ , so we must assume that  $T > d$ . For the purposes of asymptotic analysis, assume also that  $S_i/N$  is bounded

from above and bounded away from zero. Under these assumptions, in the case of  $k_\phi > 0$ , we conclude that

$$d_{\mathcal{W}}^2(\mu_T^*, \pi) = \tilde{O}\left(\frac{d}{TN}\right) \quad \text{and} \quad d_{\mathcal{W}}^2(\tilde{\mu}_T^*, \pi) = \tilde{O}\left(\frac{d^2}{N^2T} + \frac{d^3}{N^2}\right),$$

establishing the result of Theorem 5.1. For large  $N$ , the approximate ULA with  $\tilde{b}$  is more accurate.

#### REFERENCES

- [1] D. Bakry, I. Gentil, and M. Ledoux. *Analysis and Geometry of Markov Diffusion Operators*. Springer, 2014.
- [2] M. Benaïm, S. Le Borgne, F. Malrieu, and P.-A. Zitt. Quantitative ergodicity for some switched dynamical systems. *Electronic Communications in Probability*, 17(0), 2012.
- [3] S. Bubeck, R. Eldan, and J. Lehec. Finite-Time Analysis of Projected Langevin Monte Carlo. In *Advances in Neural Information Processing Systems*, July 2015.
- [4] A. S. Dalalyan. Theoretical guarantees for approximate sampling from smooth and log-concave densities. *Journal of the Royal Statistical Society: Series B (Statistical Methodology)*, 2017.
- [5] A. Durmus and E. Moulines. Sampling from a strongly log-concave distribution with the Unadjusted Langevin Algorithm. *HAL*, pages 1–25, Apr. 2016.
- [6] A. Durmus and E. Moulines. Supplement to “Sampling from a strongly log-concave distribution with the Unadjusted Langevin Algorithm”. *HAL*, pages 1–17, Apr. 2016.
- [7] A. Eberle. Reflection couplings and contraction rates for diffusions. *Probability theory and related fields*, pages 1–36, Oct. 2015.
- [8] S. N. Ethier and T. G. Kurtz. *Markov processes: characterization and convergence*, volume 282. John Wiley & Sons, 2009.
- [9] J. Gorham, A. B. Duncan, S. J. Vollmer, and L. Mackey. Measuring Sample Quality with Diffusions. *arXiv.org*, Nov. 2016.
- [10] L. Mackey and J. Gorham. Multivariate Stein Factors for Strongly Log-concave Distributions. *arXiv.org*, 2015.
- [11] H. Tanaka. Stochastic differential equations with reflecting boundary condition in convex regions. *Hiroshima Math. J.*, 9:163–177, 1979.
- [12] J. Wang.  $L^p$ -Wasserstein distance for stochastic differential equations driven by Lévy processes. *Bernoulli*, 22(3):1598–1616, Aug. 2016.

COMPUTER SCIENCE AND ARTIFICIAL INTELLIGENCE LABORATORY (CSAIL), MASSACHUSETTS INSTITUTE OF TECHNOLOGY

URL: <http://www.jhhuggins.org/>

E-mail address: [jhuggins@mit.edu](mailto:jhuggins@mit.edu)

STANFORD UNIVERSITY

URL: <http://sites.google.com/site/jamesyzou/>

E-mail address: [jamesyzou@gmail.com](mailto:jamesyzou@gmail.com)
